LEROY MISURACA, M.D.  
*Director of Critical Care Services  
Presbyterian Intercommunity Hospital  
12401 East Washington Boulevard  
Whittier, California 90602*

REFERENCE

1. Doblar DD, Hinkle JC, Fay ML, Condon BF: Air embolism associated with pulmonary artery catheter introducer kit. *ANESTHESIOLOGY* 56:307-309, 1982

(Accepted for publication May 24, 1982.)

Anesthesiology  
57:431, 1982

(Editorial Comments)

I fear we created a bit of a witch's brew when we twice published the Doblar *et al.* article. They did state in the article (both times) that, "The problem . . . may be short-lived since the manufacturer is developing a self-sealing introducer valve." Still, we wish to apologize if the article in any way misrepresented the existing Arrow product.

Regarding the duplicate publication, the reason this can't happen is that it requires sequential failure by ed-

itor, publisher, and author. The editor must forward to the publisher two separate copies of the manuscript a month apart; the publisher must fail to recognize the duplication; and the author must correct, approve, and return to the publisher two separate sets of galleys. Since it can't happen, this indeed may be a publishing first; our goal is to make sure it is the last.

THE EDITOR

Anesthesiology  
57:431, 1982

A Modified Laryngoscope Blade for Rat Intubation

*To the Editor:*—For good visualization of the larynx in rats, we are using a Miller infant blade in the modification presented in figure 1. The spatula of the blade was converted into a two-pronged speculum with narrow tips. This modification allows us to retract both tongue and soft palate so that the larynx is almost always visible, making intubation much simpler. We also found it helpful to affix the rat by his incisors, opening the mouth wider, in a method similar to that described by Medd and Heywood.<sup>1</sup>

PATRICK L. MORGAN  
*Medical Student  
Department of Anesthesiology  
School of Medicine  
University of Alabama  
Birmingham, Alabama 35294*

REFERENCE

1. Medd RK, Heywood R: A technique for intubation and repeated short-duration anaesthesia in the rat. *Lab Anim* 4:75-78, 1970

The author thanks Dr. Igor Kissin for support and advice.

(Accepted for publication May 26, 1982.)

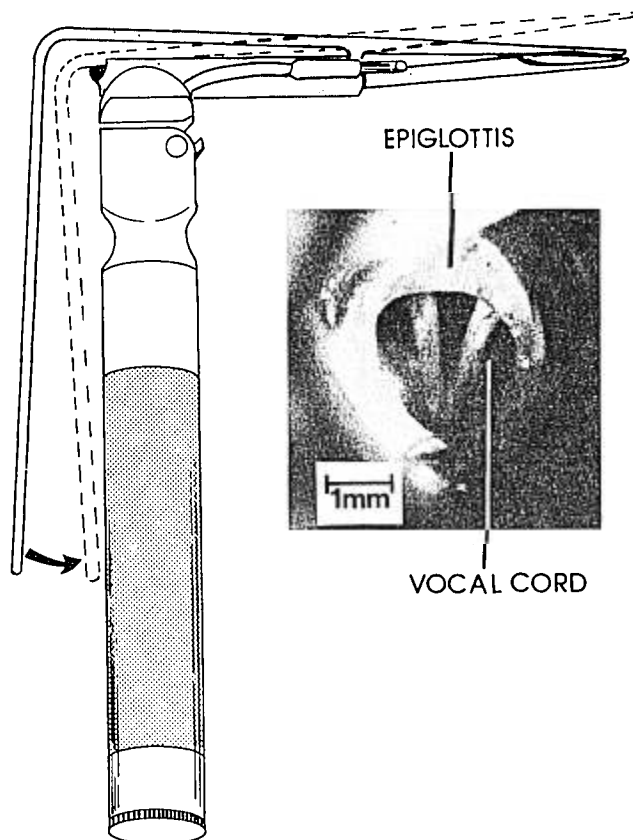

FIG. 1. Modified laryngoscope for rat intubation. Under the laryngoscope—photograph of laryngoscopic view of larynx.
